# Supplementary material for: The impact of extra-musculoskeletal manifestations on disease activity, functional status, and treatment patterns in patients with axial spondyloarthritis: results from a nationwide population-based study
Source: PubMed Central journal article supplement — Ther Adv Musculoskelet Dis. 2020 Nov 21;12:1759720X20972610. doi: 10.1177/1759720X20972610 (PMC7682214; doi:10.1177/1759720x20972610), 2020-11-21
Supplement: sj-pdf-1-tab-10.1177_1759720X20972610.pdf [file sj-pdf-1-tab-10.1177_1759720X20972610.pdf]

**Table S1** Anatomical therapeutic chemical classification system code for the pharmacological treatment related to axial spondyloarthritis and its extra-musculoskeletal manifestations

| <b>Pharmacological treatment</b>                              | <b>Anatomical therapeutic chemical classification system code</b>                                                                                                                                                                                                                                                                                                                                                                                                       |
|---------------------------------------------------------------|-------------------------------------------------------------------------------------------------------------------------------------------------------------------------------------------------------------------------------------------------------------------------------------------------------------------------------------------------------------------------------------------------------------------------------------------------------------------------|
| Non-steroidal anti-inflammatory drugs                         | M01A                                                                                                                                                                                                                                                                                                                                                                                                                                                                    |
| Non-opioid analgesics                                         | N02B                                                                                                                                                                                                                                                                                                                                                                                                                                                                    |
| Opioids                                                       | N02A                                                                                                                                                                                                                                                                                                                                                                                                                                                                    |
| Biological disease modifying anti-rheumatic drugs             | L04AA24 L04AA33 L04AB L04AC05 L04AC07 L04AC10                                                                                                                                                                                                                                                                                                                                                                                                                           |
| Conventional synthetic disease modifying anti-rheumatic drugs | A07EC01 A07EC02 L04AA06 L04AA13 L04AA31 L04AD01 L04AD02 L04AX01 L04AX03 L04AX04 L01BA01 M01CX01 M01CX02                                                                                                                                                                                                                                                                                                                                                                 |
| Systemic steroids                                             | H02AB01 H02AB02 H02AB04 H02AB06 H02AB07 H02AB09 H02AB14 H02AB56                                                                                                                                                                                                                                                                                                                                                                                                         |
| Local injectable steroids                                     | H02AB58                                                                                                                                                                                                                                                                                                                                                                                                                                                                 |
| Intestinal topical steroids                                   | A07EA02 A07EA06                                                                                                                                                                                                                                                                                                                                                                                                                                                         |
| Topical antipsoriatics                                        | D07AA02 D07AA03 D07AB02 D07AB03 D07AB07 D07AB09 D07AB11 D07AB19 D07AC01 D07AC03 D07AC04 D07AC13 D07AC14 D07AC18 D07AD01 D07BB01 D07BC05 D07CB02 D07CB04 D07CC01 D07CC02 D07XA02 D07XA11 D07XB03 D07XC01 D07XC03 D05AC01 D05AC51 D05AX02 D05AX52 D05AX03                                                                                                                                                                                                                 |
| Systemic oral antipsoriatics                                  | D05AX22 D05BB02 D05BX D05AX01 D05AX51                                                                                                                                                                                                                                                                                                                                                                                                                                   |
| Ophthalmologicals                                             | S01AA04 S01AA11 S01AA13 S01AA24 S01AA26 S01AD03 S01AD09 S01AE01 S01AE03 S01AE05 S01AE07 S01BA01 S01BA02 S01BA04 S01BA07 S01BA13 S01BA14 S01BC03 S01BC05 S01BC10 S01CA21 S01CA52 S01CA53 S01CA55 S01CA56 S01CA57 S01EA04 S01EA05 S01EB01 S01EC01 S01EC03 S01EC04 S01ED01 S01ED03 S01ED61 S01ED62 S01ED63 S01ED66 S01ED67 S01ED69 S01EE01 S01EE03 S01EE04 S01EE05 S01FA01 S01FA02 S01FA04 S01FA06 S01FB01 S01GX07 S01GX10 S01XA12 S01XA28 S01XA50 S01XA86 S01XC07 S01XC20 |
