# Supplementary material for: The impact of extra-musculoskeletal manifestations on disease activity, functional status, and treatment patterns in patients with axial spondyloarthritis: results from a nationwide population-based study
Source: PubMed Central journal article supplement — Ther Adv Musculoskelet Dis. 2020 Nov 21;12:1759720X20972610. doi: 10.1177/1759720X20972610 (PMC7682214; doi:10.1177/1759720x20972610), 2020-11-21
Supplement: sj-pdf-2-tab-10.1177_1759720X20972610.pdf [file sj-pdf-2-tab-10.1177_1759720X20972610.pdf]

**Table S2** Proportion of prescriptions of biological and conventional synthetic disease-modifying anti-rheumatic drugs as well as systemic steroids according to the care specialization of the prescriber.

|                                                     | Rheumatologists | Gastroenterologists | Dermatologists | Ophthalmologists | Others/Unknown |
|-----------------------------------------------------|-----------------|---------------------|----------------|------------------|----------------|
| bDMARDs                                             | 69.5%           | 3.9%                | -              | -                | 26.6%          |
| mAb against TNF (adalimumab, golimumab, infliximab) | 70.7%           | 4.9%                | -              | -                | 24.4%          |
| Certolizumab pegol                                  | 66.7%           | -                   | -              | -                | 33.3%          |
| Etanercept                                          | 67.5%           | 1.0%                | -              | -                | 31.5%          |
| Secukinumab                                         | 100%            | -                   | -              | -                | -              |
| Ustekinumab                                         | -               | -                   | -              | -                | 100%           |
| Vedolizumab                                         | -               | 100%                | -              | -                | -              |
| Other*                                              | 100%            | -                   | -              | -                | -              |
| csDMARDs                                            | 32.0%           | 7.8%                | -              | -                | 60.2%          |
| Methotrexate                                        | 51.9 %          | -                   | -              | -                | 48.1%          |
| Sulfasalazine                                       | 33.5%           | 3.0%                | -              | -                | 63.4%          |
| Mesalazine                                          | -               | 29.3%               | -              | -                | 70.7%          |
| Azathioprine                                        | 5.5%            | 36.4%               | -              | -                | 67.3%          |
| Leflunomide                                         | 32.7%           | -                   | -              | -                | 67.3%          |
| Other**                                             | 19.6%           | 3.9%                | -              | -                | 76.5%          |
| Systemic steroids                                   | 20.7%           | 2.8%                | 0.6%           | 0.8%             | 75.1%          |

\*including abatacept, tocilizumab; \*\*including mycophenolic acid, teriflunomide, ciclosporin, tacrolimus, lenalidomide.  
bDMARDs, biological disease-modifying anti-rheumatic drugs; csDMARDs, conventional synthetic disease-modifying anti-rheumatic drugs; mAb, monoclonal antibodies; TNF, tumor necrosis factor.
