# Supplementary material for: The impact of extra-musculoskeletal manifestations on disease activity, functional status, and treatment patterns in patients with axial spondyloarthritis: results from a nationwide population-based study
Source: PubMed Central journal article supplement — Ther Adv Musculoskelet Dis. 2020 Nov 21;12:1759720X20972610. doi: 10.1177/1759720X20972610 (PMC7682214; doi:10.1177/1759720x20972610), 2020-11-21
Supplement: sj-pdf-3-tab-10.1177_1759720X20972610.pdf [file sj-pdf-3-tab-10.1177_1759720X20972610.pdf]

**Table S3** Comorbidities defined by Elixhauser coding algorithms\* in axial spondyloarthritis patients (N=1,729) stratified by the history (ever presence; survey data) of inflammatory bowel disease, psoriasis, and anterior uveitis

|                                | Inflammatory bowel disease |             |               | Psoriasis   |             |               | Anterior uveitis |             |               |
|--------------------------------|----------------------------|-------------|---------------|-------------|-------------|---------------|------------------|-------------|---------------|
|                                | yes (N=150)                | no (N=1579) | p value       | yes (N=255) | no (N=1474) | p value       | yes (N=463)      | no (N=1266) | p value       |
| Hypertension                   | 49.9                       | 52.0        | 0.6404        | 58.8        | 50.5        | 0.0166        | 53.9             | 51.0        | 0.2794        |
| uncomplicated                  | 42.0                       | 44.8        | 0.5113        | 51.4        | 43.4        | <b>0.0187</b> | 46.3             | 43.9        | 0.3868        |
| complicated                    | 7.9                        | 7.1         | 0.7114        | 7.3         | 7.2         | 0.9273        | 7.6              | 7.0         | 0.6794        |
| Depression                     | 29.2                       | 25.3        | 0.3151        | 30.4        | 24.8        | 0.0625        | 22.4             | 26.9        | 0.0643        |
| Chronic pulmonary disease      | 12.0                       | 8.8         | 0.2114        | 12.5        | 8.5         | <b>0.0428</b> | 7.9              | 9.5         | 0.3197        |
| Diabetes                       | 17.3                       | 15.8        | 0.6485        | 17.6        | 15.7        | 0.4452        | 14.2             | 16.6        | 0.2342        |
| uncomplicated                  | 10.2                       | 7.0         | 0.1629        | 7.0         | 7.3         | 0.8585        | 7.5              | 7.2         | 0.8007        |
| complicated                    | 7.2                        | 8.8         | 0.5010        | 10.6        | 8.4         | 0.2518        | 6.7              | 9.5         | 0.0784        |
| Cardiac arrhythmias            | 15.1                       | 14.0        | 0.7260        | 15.1        | 13.9        | 0.6245        | 17.8             | 12.7        | <b>0.0082</b> |
| Obesity                        | 10.9                       | 14.6        | 0.2126        | 18.0        | 13.6        | 0.0687        | 10.7             | 15.6        | <b>0.0107</b> |
| Hypothyroidism                 | 7.0                        | 14.2        | <b>0.0122</b> | 11.8        | 13.9        | 0.3718        | 12.4             | 14.1        | 0.3720        |
| Osteoporosis                   | 18.7                       | 12.1        | <b>0.0237</b> | 12.9        | 12.7        | 0.9300        | 15.7             | 11.6        | <b>0.0258</b> |
| Liver disease                  | 11.4                       | 11.9        | 0.8600        | 12.0        | 11.8        | 0.9259        | 12.1             | 11.8        | 0.8698        |
| Peripheral vascular disorders  | 8.4                        | 8.7         | 0.9114        | 10.2        | 8.4         | 0.3566        | 9.4              | 8.4         | 0.5288        |
| Solid tumor without metastasis | 7.2                        | 8.6         | 0.5719        | 8.3         | 8.4         | 0.9516        | 7.6              | 8.7         | 0.4901        |
| Valvular disease               | 6.3                        | 8.3         | 0.4172        | 9.0         | 8.0         | 0.5952        | 8.7              | 7.9         | 0.6234        |
| Renal failure                  | 9.1                        | 7.1         | 0.3901        | 7.3         | 7.3         | 0.9637        | 7.4              | 7.3         | 0.9136        |
| Congestive heart failure       | 5.1                        | 5.8         | 0.7425        | 6.2         | 5.7         | 0.7881        | 6.3              | 5.6         | 0.5744        |

|                                         |      |     |               |     |     |               |     |     |               |
|-----------------------------------------|------|-----|---------------|-----|-----|---------------|-----|-----|---------------|
| Deficiency anemia                       | 11.8 | 5.0 | <b>0.0007</b> | 4.6 | 5.8 | 0.4589        | 6.0 | 5.5 | 0.6962        |
| Fibromyalgia                            | 8.6  | 3.9 | <b>0.0095</b> | 8.3 | 3.6 | <b>0.0009</b> | 2.9 | 4.9 | 0.0641        |
| Other neurological disorders            | 3.2  | 3.7 | 0.7481        | 4.1 | 3.6 | 0.6983        | 1.8 | 4.3 | <b>0.0157</b> |
| Coagulopathy                            | 3.0  | 2.8 | 0.9223        | 3.7 | 2.7 | 0.3536        | 2.2 | 3.1 | 0.3751        |
| Fluid and electrolyte disorders         | 2.3  | 1.9 | 0.6987        | 2.6 | 1.8 | 0.3650        | 2.3 | 1.8 | 0.4939        |
| Weight loss                             | 3.4  | 1.3 | 0.0580        | 2.0 | 1.4 | 0.5056        | 2.0 | 1.3 | 0.3569        |
| Alcohol abuse                           | 2.3  | 1.5 | 0.5144        | 2.3 | 1.5 | 0.3914        | 1.4 | 1.7 | 0.6621        |
| Metastatic cancer                       | 1.4  | 1.4 | 0.9857        | 2.1 | 1.3 | 0.3244        | 1.6 | 1.3 | 0.7523        |
| Peptic ulcer disease excluding bleeding | -    | 1.5 | -             | 2.0 | 1.2 | 0.3343        | 1.7 | 1.2 | 0.4503        |
| Pulmonary circulation disorders         | 2.0  | 1.2 | 0.4325        | 1.2 | 1.3 | 0.9501        | 1.2 | 1.3 | 0.8213        |
| Paralysis                               | 0.7  | 1.2 | 0.5939        | 1.2 | 1.1 | 0.8724        | 1.2 | 1.1 | 0.8754        |
| Drug abuse                              | 1.8  | 1.1 | 0.4159        | 1.7 | 1.1 | 0.4461        | 1.4 | 1.1 | 0.5511        |
| Lymphoma                                | -    | 0.7 | -             | 2.1 | 0.3 | <b>0.0014</b> | 0.6 | 0.6 | 0.8874        |
| Psychoses                               | -    | 0.6 | -             | 0.3 | 0.6 | 0.5025        | 0.7 | 0.4 | 0.4891        |
| Blood loss anemia                       | -    | 0.1 | -             | -   | 0.2 | -             | 0.5 | -   | -             |
| AIDS/HIV                                | -    | -   | -             | -   | -   | -             | -   | -   | -             |

\* excluding rheumatoid arthritis / collagen vascular diseases and including osteoporosis and fibromyalgia.

Significant differences were assessed using Rao-Scott chi-square tests. P values <0.05 are shown in bold.
