# Supplementary material for: The impact of extra-musculoskeletal manifestations on disease activity, functional status, and treatment patterns in patients with axial spondyloarthritis: results from a nationwide population-based study
Source: PubMed Central journal article supplement — Ther Adv Musculoskelet Dis. 2020 Nov 21;12:1759720X20972610. doi: 10.1177/1759720X20972610 (PMC7682214; doi:10.1177/1759720x20972610), 2020-11-21
Supplement: sj-pdf-4-tab-10.1177_1759720X20972610.pdf [file sj-pdf-4-tab-10.1177_1759720X20972610.pdf]

**Table S4** Comorbidities defined by Elixhauser coding algorithms\* in axial spondyloarthritis patients (N=1,729) stratified by the current presence (in 2015; health insurance data) of inflammatory bowel disease, psoriasis, and anterior uveitis

|                                | Inflammatory bowel disease |             |               | Psoriasis   |             |               | Anterior uveitis |             |               |
|--------------------------------|----------------------------|-------------|---------------|-------------|-------------|---------------|------------------|-------------|---------------|
|                                | yes (N=98)                 | no (N=1631) | p value       | yes (N=165) | no (N=1564) | p value       | yes (N=151)      | no (N=1578) | p value       |
| Hypertension                   | 48.4                       | 52.0        | 0.4976        | 59.9        | 50.9        | <b>0.0295</b> | 48.7             | 52.1        | 0.4396        |
| uncomplicated                  | 37.2                       | 45.0        | 0.1384        | 53.1        | 43.7        | <b>0.0229</b> | 42.6             | 44.8        | 0.6166        |
| complicated                    | 11.2                       | 6.9         | 0.1160        | 6.8         | 7.2         | 0.8522        | 6.1              | 7.3         | 0.5998        |
| Depression                     | 30.1                       | 25.4        | 0.3037        | 35.7        | 24.6        | <b>0.0023</b> | 23.0             | 25.9        | 0.4458        |
| Chronic pulmonary disease      | 11.0                       | 9.0         | 0.5117        | 12.2        | 8.8         | 0.1460        | 6.3              | 9.4         | 0.2315        |
| Diabetes                       | 19.4                       | 15.8        | 0.3533        | 19.2        | 15.6        | 0.2432        | 12.9             | 16.3        | 0.3002        |
| uncomplicated                  | 7.2                        | 7.3         | 0.9644        | 7.6         | 7.2         | 0.8860        | 6.5              | 7.3         | 0.7129        |
| complicated                    | 12.3                       | 8.5         | 0.2185        | 11.7        | 8.4         | 0.1686        | 6.4              | 8.9         | 0.3133        |
| Cardiac arrhythmias            | 17.3                       | 13.9        | 0.3652        | 18.0        | 13.6        | 0.1305        | 12.8             | 14.2        | 0.6297        |
| Obesity                        | 10.4                       | 14.5        | 0.2429        | 19.3        | 13.7        | 0.0551        | 7.5              | 14.9        | <b>0.0114</b> |
| Hypothyroidism                 | 6.9                        | 14.0        | <b>0.0479</b> | 12.5        | 13.7        | 0.6581        | 11.6             | 13.8        | 0.4583        |
| Osteoporosis                   | 16.1                       | 12.5        | 0.3128        | 16.2        | 12.3        | 0.1675        | 16.9             | 12.3        | 0.1096        |
| Liver disease                  | 9.5                        | 12.0        | 0.4695        | 13.1        | 11.7        | 0.6111        | 12.5             | 11.8        | 0.7838        |
| Peripheral vascular disorders  | 8.5                        | 8.7         | 0.9495        | 6.7         | 8.9         | 0.3548        | 6.0              | 8.9         | 0.2264        |
| Solid tumor without metastasis | 10.0                       | 8.3         | 0.5728        | 8.5         | 8.4         | 0.9752        | 6.7              | 8.6         | 0.4421        |
| Valvular disease               | 8.6                        | 8.1         | 0.8458        | 8.7         | 8.0         | 0.7799        | 9.3              | 8.0         | 0.5843        |
| Renal failure                  | 11.0                       | 7.1         | 0.1678        | 8.7         | 7.2         | 0.4865        | 6.8              | 7.4         | 0.7778        |
| Congestive heart failure       | 5.7                        | 5.8         | 0.9593        | 7.5         | 5.6         | 0.3378        | 4.8              | 5.9         | 0.5828        |

|                                         |      |     |                   |      |     |                   |     |     |               |
|-----------------------------------------|------|-----|-------------------|------|-----|-------------------|-----|-----|---------------|
| Deficiency anemia                       | 15.2 | 5.1 | <b>&lt;0.0001</b> | 4.9  | 5.7 | 0.6577            | 4.6 | 5.7 | 0.5611        |
| Fibromyalgia                            | 3.0  | 4.4 | 0.5255            | 11.8 | 3.5 | <b>&lt;0.0001</b> | 3.1 | 4.4 | 0.4391        |
| Other neurological disorders            | 3.0  | 3.7 | 0.7209            | 4.3  | 3.6 | 0.6324            | 2.0 | 3.8 | 0.2748        |
| Coagulopathy                            | 5.0  | 2.7 | 0.1901            | 4.8  | 2.6 | 0.1129            | 0.6 | 3.0 | 0.0713        |
| Fluid and electrolyte disorders         | 2.4  | 1.9 | 0.7116            | 3.5  | 1.7 | 0.1100            | 1.3 | 2.0 | 0.5858        |
| Weight loss                             | 4.3  | 1.4 | <b>0.0253</b>     | 1.8  | 1.5 | 0.7428            | 2.0 | 1.5 | 0.6046        |
| Alcohol abuse                           | -    | 1.7 | -                 | 2.8  | 1.5 | 0.2438            | 2.9 | 1.5 | 0.2128        |
| Metastatic cancer                       | 1.1  | 1.4 | 0.7775            | -    | 1.6 | -                 | 2.0 | 1.3 | 0.5211        |
| Peptic ulcer disease excluding bleeding | 1.3  | 1.3 | 0.9604            | 2.5  | 1.2 | 0.1872            | 2.6 | 1.2 | 0.1725        |
| Pulmonary circulation disorders         | 4.3  | 1.1 | 0.0073            | 1.2  | 1.3 | 0.9365            | 0.7 | 1.3 | 0.5617        |
| Paralysis                               | -    | 1.2 | -                 | 1.2  | 1.1 | 0.9157            | 1.4 | 1.1 | 0.7800        |
| Drug abuse                              | 2.9  | 1.1 | 0.0950            | 3.1  | 1.0 | <b>0.0140</b>     | 1.9 | 1.1 | 0.3783        |
| Lymphoma                                | -    | 0.6 | -                 | 1.3  | 0.5 | 0.2282            | 0.6 | 0.6 | 0.9969        |
| Psychoses                               | 1.0  | 0.5 | 0.4541            | 0.6  | 0.5 | 0.8741            | 0.7 | 0.5 | 0.7038        |
| Blood loss anemia                       | -    | 0.1 | -                 | -    | 0.1 | -                 | 0.8 | 0.1 | <b>0.0227</b> |
| AIDS/HIV                                | -    | -   | -                 | -    | -   | -                 | -   | -   | -             |

\* excluding rheumatoid arthritis / collagen vascular diseases and including osteoporosis and fibromyalgia.

Significant differences were assessed using Rao-Scott chi-square tests. P values <0.05 are shown in bold.
